# Supplementary material
Source: bioRxiv or medRxiv preprint supplement (https://www.biorxiv.org/highwire/filestream/130491/field_highwire_adjunct_files/7/434654-5.pdf)
Supplement: Supplementary file [file 434654-5.pdf]

1 **Table S4.** Effects of warming and precipitation treatments (fixed effects) on TMB in the  
 2 summer and the fall, using a mixed-effects model that included the fixed effect of time and  
 3 the random effect of blocks. P values for Type III sum of squares with a Satterthwaite  
 4 approximation for the degrees of freedom. Significance codes:  $P < 0.001$  '\*\*\*',  $0.05 < P < 0.1$   
 5 '†'.

6

|                      | <b>Sum. Sq.</b> | <b>Mean Sq.</b> | <b>num df</b> | <b>den df</b> | <b>F</b> | <b>P</b>   |
|----------------------|-----------------|-----------------|---------------|---------------|----------|------------|
| <b>Precip</b>        | 0.012           | 0.006           | 2             | 68.027        | 0.931    | 0.399      |
| <b>Temp</b>          | 0.019           | 0.006           | 3             | 68.027        | 1.004    | 0.396      |
| <b>Season</b>        | 0.133           | 0.133           | 1             | 68.027        | 21.129   | < 0.001*** |
| <b>Precip:Temp</b>   | 0.077           | 0.013           | 6             | 68.026        | 2.022    | 0.074 †    |
| <b>Precip:Season</b> | 0.012           | 0.006           | 2             | 68.027        | 0.921    | 0.403      |
| <b>Temp:Season</b>   | 0.010           | 0.003           | 3             | 68.027        | 0.551    | 0.649      |

7
